# Supplementary material for: Comprehensive identification of somatic nucleotide variants in human brain tissue
Source: PubMed Central journal article supplement (PMC8006362; doi:10.1186/s13059-021-02285-3), 2021-03-29
Supplement: 13059_2021_2285_MOESM5_ESM.pdf [file 13059_2021_2285_MOESM5_ESM.pdf]

| Name           |                | Institution                             | E-mail                                  | Comments |
|----------------|----------------|-----------------------------------------|-----------------------------------------|----------|
| Sara           | Bizzotto       | Boston Children's Hospital              | Sara.Bizzotto@CHILDRENS.HARVARD.EDU     |          |
| Michael        | Coulter        | Boston Children's Hospital              | Michael_Coulter@HMS.HARVARD.EDU         |          |
| Caroline       | Dias           | Boston Children's Hospital              | Caroline.Dias@CHILDRENS.HARVARD.EDU     |          |
| Alissa         | D'Gama         | Boston Children's Hospital              | Alissa_D'Gama@HMS.HARVARD.EDU           |          |
| Javier         | Ganz           | Boston Children's Hospital              | javier.ganz@CHILDRENS.HARVARD.EDU       |          |
| Robert         | Hill           | Boston Children's Hospital              | rshill.wl@GMAIL.COM                     |          |
| August Yue     | Huang          | Boston Children's Hospital              | Yue.Huang@CHILDRENS.HARVARD.EDU         |          |
| Sattar         | Khoshkhoo      | Boston Children's Hospital              | Sattar.Khoshkhoo@CHILDRENS.HARVARD.EDU  |          |
| Sonia          | Kim            | Boston Children's Hospital              | soniakim@G.HARVARD.EDU                  |          |
| Alice          | Lee            | Boston Children's Hospital              | ejalice.lee@GMAIL.COM                   |          |
| Michael        | Lodato         | Boston Children's Hospital              | mlodato@GMAIL.COM                       |          |
| Eduardo        | Maury          | Boston Children's Hospital              | eduardo_maury@hms.harvard.edu           |          |
| Michael        | Miller         | Boston Children's Hospital              | mbmiller@bwh.harvard.edu                |          |
| Rebeca         | Borges-Monroy  | Boston Children's Hospital              | rborgesmonroy@G.HARVARD.EDU             |          |
| Rachel         | Rodin          | Boston Children's Hospital              | rachelereiff@GMAIL.COM                  |          |
| Christopher A. | Walsh          | Boston Children's Hospital              | Christopher.Walsh@CHILDRENS.HARVARD.EDU |          |
| Zinan          | Zhou           | Boston Children's Hospital              | Zinan.Zhou@CHILDRENS.HARVARD.EDU        |          |
| Craig          | Bohrson        | Harvard University                      | craigbohrson@GMAIL.COM                  |          |
| Chong          | Chu            | Harvard University                      | chong_chu@HMS.HARVARD.EDU               |          |
| Isidro         | Cortes-Soriano | Harvard University                      | isidrolauscher@GMAIL.COM                |          |
| Yanmei         | Dou            | Harvard University                      | Yanmei_Dou@HMS.HARVARD.EDU              |          |
| Alon           | Galor          | Harvard University                      | alon_galor@HMS.HARVARD.EDU              |          |
| Doga           | Gulhan         | Harvard University                      | Doga_Gulhan@HMS.HARVARD.EDU             |          |
| Minseok        | Kwon           | Harvard University                      | minseok_kwon@HMS.HARVARD.EDU            |          |
| Joe            | Luquette       | Harvard University                      | luquette@G.HARVARD.EDU                  |          |
| Peter          | Park           | Harvard University                      | peter_park@HMS.HARVARD.EDU              |          |
| Maxwell        | Sherman        | Harvard University                      | Maxwell_Sherman@HMS.HARVARD.EDU         |          |
| Vinay          | Viswanadham    | Harvard University                      | vvv776@G.HARVARD.EDU                    |          |
| Schahram       | Akbarian       | Icahn School of Medicine at Mount Sinai | schahram.akbarian@MSSM.EDU              |          |
| Andrew         | Chess          | Icahn School of Medicine at Mount Sinai | andrew.chess@MSSM.EDU                   |          |
| Attila         | Jones          | Icahn School of Medicine at Mount Sinai | attila.g.jones@gmail.com                |          |
| Chaggai        | Rosenbluh      | Icahn School of Medicine at Mount Sinai | chaggai.rosenbluh@MSSM.EDU              |          |
| Sean           | Cho            | Kennedy Krieger Institute               | sean.cho@JHMI.EDU                       |          |
| Ben            | Langmead       | Kennedy Krieger Institute               | langmea@CS.JHU.EDU                      |          |
| Jonathan       | Pevsner        | Kennedy Krieger Institute               | pevsner@KENNEDYKRIEGER.ORG              |          |
| Jeremy         | Thorpe         | Kennedy Krieger Institute               | jthorpe6@JHMI.EDU                       |          |
| Jennifer       | Erwin          | Lieber Institute for Brain Development  | Jennifer.Erwin@libd.org                 |          |
| Andrew         | Jaffe          | Lieber Institute for Brain Development  | Andrew.Jaffe@LIBD.ORG                   |          |
| Michael        | McConnell      | Lieber Institute for Brain Development  | mikemc@libd.org                         |          |
| Rujuta         | Narurkar       | Lieber Institute for Brain Development  | Rujuta.Narurkar@LIBD.ORG                |          |
| Apua           | Paquola        | Lieber Institute for Brain Development  | apuapaquola@GMAIL.COM                   |          |
| Jooheon        | Shin           | Lieber Institute for Brain Development  | jooheon.shin@LIBD.ORG                   |          |
| Richard        | Straub         | Lieber Institute for Brain Development  | Richard.Straub@LIBD.ORG                 |          |
| Daniel         | Weinberger     | Lieber Institute for Brain Development  | drweinberger@LIBD.ORG                   |          |
| Alexej         | Abyzov         | Mayo Clinic Rochester                   | Abyzov.Alexej@MAYO.EDU                  |          |
| Taejeong       | Bae            | Mayo Clinic Rochester                   | Bae.Taejeong@MAYO.EDU                   |          |
| Yeongjun       | Jang           | Mayo Clinic Rochester                   | Jang.Yeongjun@mayo.edu                  |          |
| Cindy          | Molitor        | Sage Bionetworks                        | cindy.molitor@SAGEBASE.ORG              |          |
| Mette          | Peters         | Sage Bionetworks                        | mette.peters@SAGEBASE.ORG               |          |
| Fred           | Gage           | Salk Institute for Biological Studies   | gage@SALK.EDU                           |          |
| Sara           | Linker         | Salk Institute for Biological Studies   | slinker@SALK.EDU                        |          |
| Patrick        | Reed           | Salk Institute for Biological Studies   | preed@SALK.EDU                          |          |
| Meiyan         | Wang           | Salk Institute for Biological Studies   | mwang@SALK.EDU                          |          |
| Alexander      | Urban          | Stanford University                     | aeurban@STANFORD.EDU                    |          |
| Bo             | Zhou           | Stanford University                     | bo.zhou@STANFORD.EDU                    |          |
| Xiaowei        | Zhu            | Stanford University                     | xwzhu@STANFORD.EDU                      |          |
| Reenal         | Pattni         | Stanford University                     | reenal@stanford.edu                     |          |

|                  |                      |                                                |                             |  |
|------------------|----------------------|------------------------------------------------|-----------------------------|--|
| <b>Aitor</b>     | <b>Serres Amero</b>  | Universitat Pompeu Fabra                       | aitor.serres@UPF.EDU        |  |
| <b>David</b>     | <b>Juan</b>          | Universitat Pompeu Fabra                       | david.juan@UPF.EDU          |  |
| <b>Irene</b>     | <b>Lobon</b>         | Universitat Pompeu Fabra                       | irenelobong@GMAIL.COM       |  |
| <b>Tomas</b>     | <b>Marques-Bonet</b> | Universitat Pompeu Fabra                       | tomas.marques@UPF.EDU       |  |
| <b>Manuel</b>    | <b>Solis Moruno</b>  | Universitat Pompeu Fabra                       | manuelsolismoruno@GMAIL.COM |  |
| <b>Raquel</b>    | <b>Garcia Perez</b>  | Universitat Pompeu Fabra                       | raquel.garcia@UPF.EDU       |  |
| <b>Inna</b>      | <b>Povolotskaya</b>  | Universitat Pompeu Fabra                       | inna.povolotskaya@UPF.EDU   |  |
| <b>Eduardo</b>   | <b>Soriano</b>       | University of Barcelona                        | esoriano@ub.edu             |  |
| <b>Gary</b>      | <b>Mathern</b>       | University of California, Los Angeles          | gmathern@UCLA.EDU           |  |
| <b>Danny</b>     | <b>Antaki</b>        | University of California, San Diego            | dantakli@UCSD.EDU           |  |
| <b>Dan</b>       | <b>Averbuj</b>       | University of California, San Diego            | dan.averbuj@GMAIL.COM       |  |
| <b>Laurel</b>    | <b>Ball</b>          | University of California, San Diego            | llball@UCSD.EDU             |  |
| <b>Martin</b>    | <b>Breuss</b>        | University of California, San Diego            | mbreuss@UCSD.EDU            |  |
| <b>Eric</b>      | <b>Courchesne</b>    | University of California, San Diego            | ecourchesne1949@GMAIL.COM   |  |
| <b>Joseph</b>    | <b>Gleeson</b>       | University of California, San Diego            | jogleeson@ucsd.edu          |  |
| <b>Xiaoxu</b>    | <b>Yang</b>          | University of California, San Diego            | xiy010@health.ucsd.edu      |  |
| <b>Changuk</b>   | <b>Chung</b>         | University of California, San Diego            | chchung@health.ucsd.edu     |  |
| <b>Sarah</b>     | <b>Emery</b>         | University of Michigan                         | sbherman@MED.UMICH.EDU      |  |
| <b>Diane</b>     | <b>Flasch</b>        | University of Michigan                         | daflasch@UMICH.EDU          |  |
| <b>Jeffrey</b>   | <b>Kidd</b>          | University of Michigan                         | jmkidd@MED.UMICH.EDU        |  |
| <b>Haira</b>     | <b>Kopera</b>        | University of Michigan                         | chongh@UMICH.EDU            |  |
| <b>Kenneth</b>   | <b>Kwan</b>          | University of Michigan                         | kykwan@UMICH.EDU            |  |
| <b>Ryan</b>      | <b>Mills</b>         | University of Michigan                         | remills@UMICH.EDU           |  |
| <b>John</b>      | <b>Moldovan</b>      | University of Michigan                         | jmoldova@UMICH.EDU          |  |
| <b>John</b>      | <b>Moran</b>         | University of Michigan                         | moranj@UMICH.EDU            |  |
| <b>Chen</b>      | <b>Sun</b>           | University of Michigan                         | cnsun@umich.edu             |  |
| <b>Xuefang</b>   | <b>Zhao</b>          | University of Michigan                         | xuefzhao@UMICH.EDU          |  |
| <b>Weichen</b>   | <b>Zhou</b>          | University of Michigan                         | arthurz@UMICH.EDU           |  |
| <b>Frisbie</b>   | <b>Trenton</b>       | University of Michigan                         | friz@umich.edu              |  |
| <b>Yifan</b>     | <b>Wang</b>          | University of Michigan / Mayo Clinic Rochester | Wang.Yifan@mayo.edu         |  |
| <b>Adriana</b>   | <b>Cherskov</b>      | Yale University                                | adriana.cherskov@YALE.EDU   |  |
| <b>Liana</b>     | <b>Fasching</b>      | Yale University                                | liana.fasching@YALE.EDU     |  |
| <b>Alexandre</b> | <b>Jourdon</b>       | Yale University                                | alexandre.jourdon@YALE.EDU  |  |
| <b>Sirisha</b>   | <b>Pochareddy</b>    | Yale University                                | sirisha.pochareddy@YALE.EDU |  |
| <b>Soraya</b>    | <b>Scuderi</b>       | Yale University                                | soraya.scuderi@YALE.EDU     |  |
| <b>Nenad</b>     | <b>Sestan</b>        | Yale University                                | nenad.sestan@YALE.EDU       |  |
| <b>Flora</b>     | <b>Vaccarino</b>     | Yale University                                | flora.vaccarino@YALE.EDU    |  |
